# Supplementary material for: Engineered extracellular matrices with controlled mechanics modulate renal proximal tubular cell epithelialization
Source: PubMed Central journal article supplement (PMC5513452; doi:10.1371/journal.pone.0181085), 2017-07-17
Supplement: pone.0181085.s001.pdf [file pone.0181085.s001.pdf]

| Antibody Target            | MW# (kD)  | Clone      | Species      | Dilution | Application | Manufacturer | Catalog Number |
|----------------------------|-----------|------------|--------------|----------|-------------|--------------|----------------|
| Acetyl-alpha-Tubulin       | N/A       | 6-11B-1    | Mouse IgG2b  | 1:400    | IF          | TFS*         | 32-2700        |
| Collagen IV                | N/A       | COL-94     | Mouse IgG1   | 1:400    | IF          | TFS          | MA1-22148      |
| Vinculin                   | N/A       | hVIN-1     | Mouse IgG1   | 1:400    | IF          | Sigma        | V9131          |
| YAP                        | N/A       | 63.7       | Mouse IgG2a  | 1:200    | IF          | SCBT         | 101199         |
| ZO-1                       | N/A       | ZO1-1A12   | Mouse IgG1   | 1:400    | IF          | TFS          | 33-9100        |
| Smooth Muscle Actin        | 42        | 1A4        | Mouse IgG 2a | 1:1000   | WB          | TFS          | MA5-11547      |
| Cleaved Caspase 3          | 17, 19    | 5A1E       | Rabbit IgG   | 1:1000   | WB          | CST          | 9664           |
| ERK1/2                     | 44, 42    | 137F5      | Rabbit IgG   | 1:1000   | WB          | CST          | 4695           |
| FAK                        | 125       | D2R2E      | Rabbit IgG   | 1:1000   | WB          | CST          | 13009          |
| GGT                        | Multiple& | 3E6        | Mouse IgG 2a | 1:1000   | WB          | SCBT         | 100746         |
| GAPDH                      | 37        | Polyclonal | Goat         | 1:2000   | WB          | SCBT         | 20357          |
| Phospho ERK1/2 (T202/Y204) | 44, 42    | D13.14.4E  | Rabbit IgG   | 1:2000   | WB          | CST          | 4370           |
| Phospho FAK (Y397)         | 125       | D20B1      | Rabbit IgG   | 1:1000   | WB          | CST          | 8556           |

Abbreviations:

CST-Cell Signaling Technology, Danvers, MA

ERK1/2-Extracellular signal regulated kinase (p44/42 mitogen-activated protein kinase)

FAK-Focal adhesion kinase

GGT-gamma-glutamyltransferase

GAPDH-glyceraldehyde 3-phosphate dehydrogenase

IF-Immunofluorescence

SCBT-Santa Cruz Biotechnology, Dallas, TX

TFS-Thermo Fisher Scientific, Waltham, MA

WB-Western blot

YAP-Yes-associated protein

ZO-1-Zonula occludens-1

#molecular weight used to identify relevant band(s) in all reported western blot images.

\*was received as a kind gift from Innovative Biotherapies, Ann Arbor, MI.

&see text for details
